# Supplementary material
Source: PubMed Central journal article supplement (PMC2883640)
Supplement: NIHMS195218-supplement-01.pdf [file NIHMS195218-supplement-01.pdf]

**Figure legends for supplementary data**

**Fig S1** ZD7288 did not significantly affect L-type Ca<sup>2+</sup> currents (*I*<sub>Ca,L</sub>). **(A)** *I*<sub>Ca,L</sub> traces before and after 3 μM ZD7288. **(B)** I-V relationship of *I*<sub>Ca,L</sub> under control conditions and in the presence of 3 μM ZD7288 (n=5). *I*<sub>Ca,L</sub> was recorded as described previously (Wu et al. Proc Natl Acad Sci U S A. 2009; 106(14):5972-7)

**Fig S2** ZD7288 and ryanodine on the diastolic depolarization (DD). Characteristics of DD were analyzed as described previously (Bogdanov et al. Circ Res. 2006;99:979-87; Bucchi et al. J Mol Cell Cardiol. 2007;43:39-48). EDD: Slope of early diastolic depolarization (mV/ms). TOP: Action potential take-off potential (mV). **(A)** AP traces before and after 3 μM ZD7288. **(B)** The summary data showed that ZD7288 significantly reduced EDD but not TOP (n=5), suggesting ZD7288 mainly affected the early linear DD. Note the values were normalized to control. **(C)** AP traces before and after 2 μM ryanodine. **(D)** The summary data showed that ryanodine reduced TOP but not EDD (n=5), suggesting ryanodine mainly affected the late non-linear DD. The values were normalized to control. \*P<0.05 vs control, \*\*P<0.01 vs control.

**Fig S3** Ryanodine did not significantly alter peak L-type Ca<sup>2+</sup> currents (*I*<sub>Ca,L</sub>). **(A)** *I*<sub>Ca,L</sub> traces before and after 2 μM ryanodine. **(B)** I-V relationship of *I*<sub>Ca,L</sub> under control conditions and in the presence of 3 μM ryanodine (n=7).

--Fig S1 --

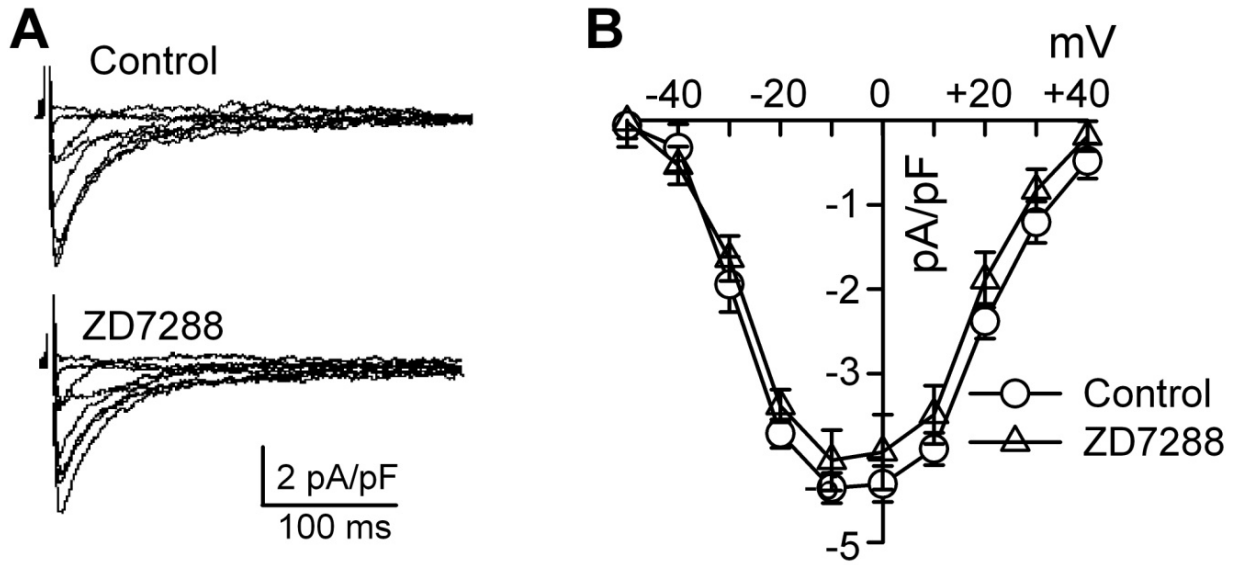

--Fig S2--

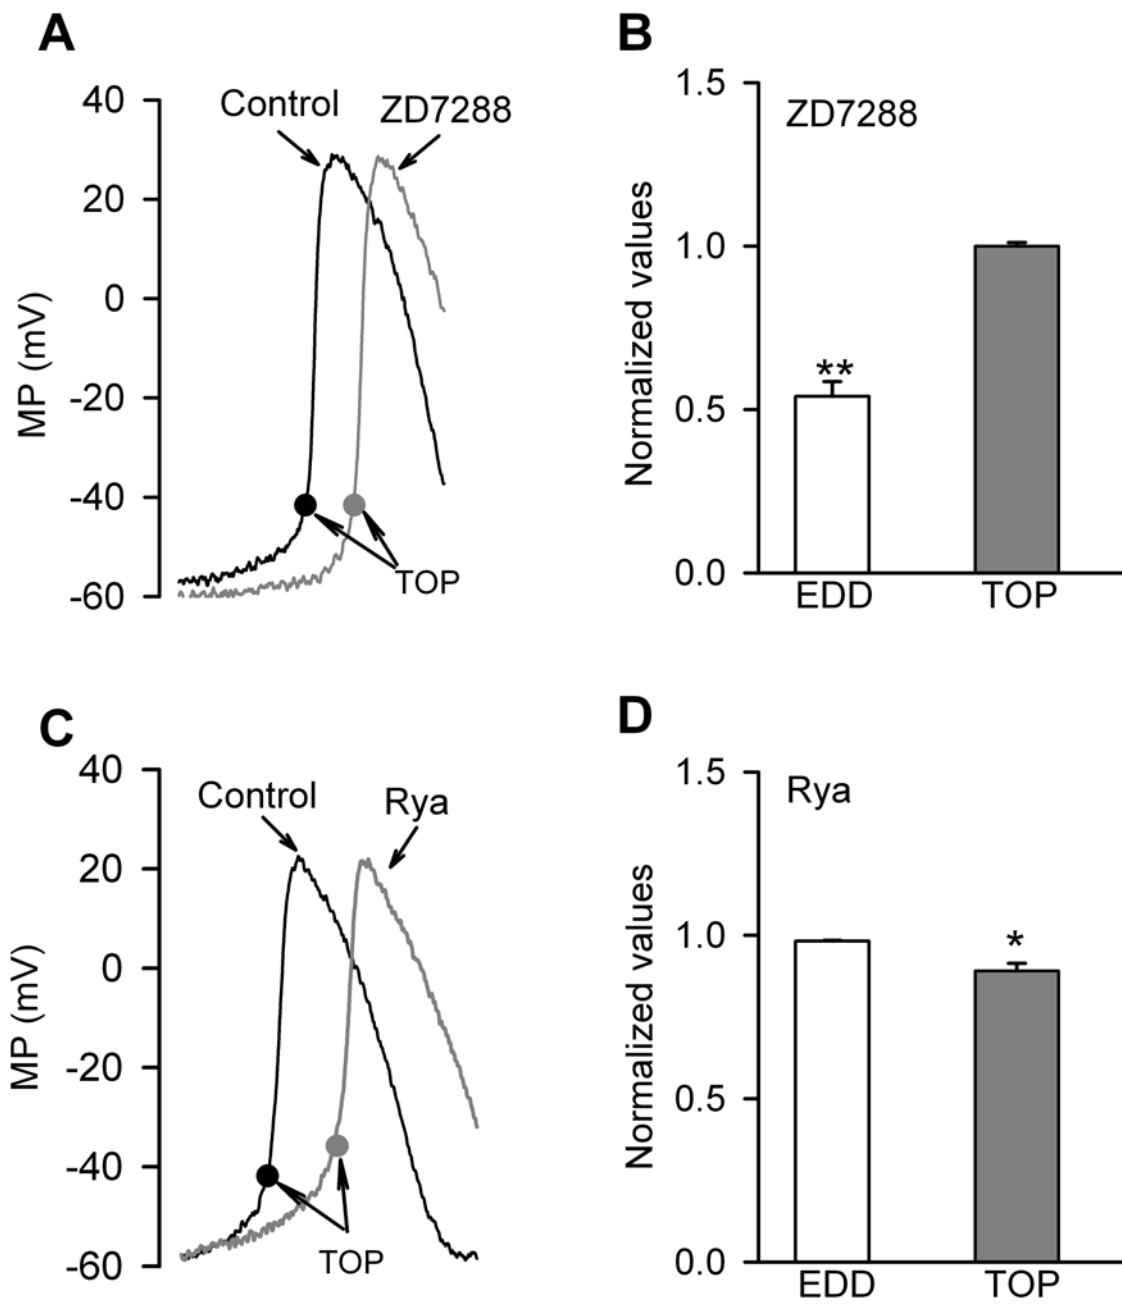

--Fig S3--

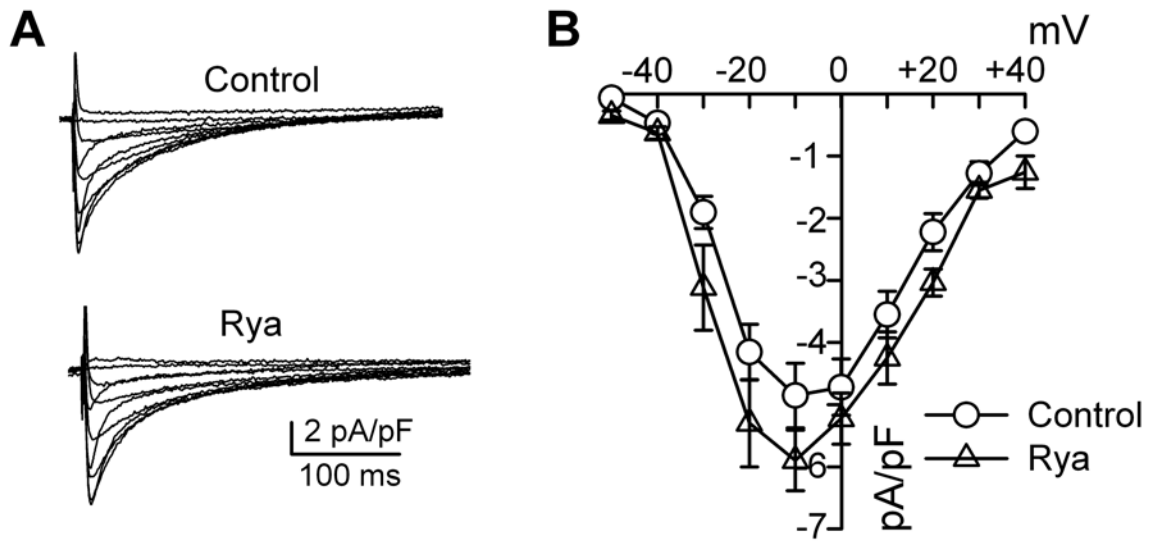

**Figure legends for supplementary data**

**Fig S1** ZD7288 did not significantly affect L-type Ca<sup>2+</sup> currents (*I*<sub>Ca,L</sub>). **(A)** *I*<sub>Ca,L</sub> traces before and after 3 μM ZD7288. **(B)** I-V relationship of *I*<sub>Ca,L</sub> under control conditions and in the presence of 3 μM ZD7288 (n=5). *I*<sub>Ca,L</sub> was recorded as described previously (Wu et al. Proc Natl Acad Sci U S A. 2009; 106(14):5972-7)

**Fig S2** ZD7288 and ryanodine on the diastolic depolarization (DD). Characteristics of DD were analyzed as described previously (Bogdanov et al. Circ Res. 2006;99:979-87; Bucchi et al. J Mol Cell Cardiol. 2007;43:39-48). EDD: Slope of early diastolic depolarization (mV/ms). TOP: Action potential take-off potential (mV). **(A)** AP traces before and after 3 μM ZD7288. **(B)** The summary data showed that ZD7288 significantly reduced EDD but not TOP (n=5), suggesting ZD7288 mainly affected the early linear DD. Note the values were normalized to control. **(C)** AP traces before and after 2 μM ryanodine. **(D)** The summary data showed that ryanodine reduced TOP but not EDD (n=5), suggesting ryanodine mainly affected the late non-linear DD. The values were normalized to control. \*P<0.05 vs control, \*\*P<0.01 vs control.

**Fig S3** Ryanodine did not significantly alter peak L-type Ca<sup>2+</sup> currents (*I*<sub>Ca,L</sub>). **(A)** *I*<sub>Ca,L</sub> traces before and after 2 μM ryanodine. **(B)** I-V relationship of *I*<sub>Ca,L</sub> under control conditions and in the presence of 3 μM ryanodine (n=7).
